# Supplementary material for: Nanomolar level detection of metal ions by improving the monodispersity and stability of nitrogen-doped graphene quantum dots
Source: Royal Society of Chemistry journal article supplement (doi:10.1039/d1nj04551b), 2021-01-01
Supplement: d1nj04551b1.pdf [file d1nj04551b1.pdf]

## Nanomolar Level Detection of Metal Ions by Improving the Monodispersity and Stability of Nitrogen-Doped Graphene Quantum Dots

Neeraj Sohal, Simran Kaur Bhatia, Soumen Basu\* and Banibrata Maity\*

*School of Chemistry and Biochemistry, Thapar Institute of Engineering and Technology  
Patiala 147004, India*

\*Corresponding Author E-mail: [soumen.basu@thapar.edu](mailto:soumen.basu@thapar.edu) (S. Basu);

[banibrata.maity@thapar.edu](mailto:banibrata.maity@thapar.edu) (B. Maity)

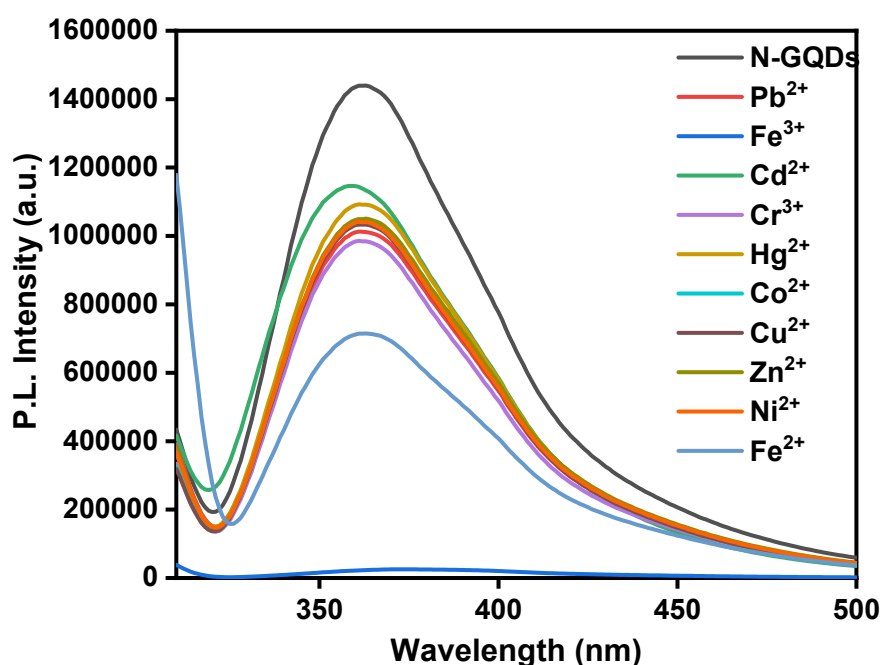

**Figure S1:** The PL spectra of N-GQDs in the presence of different metal ions.

**Table S1:** Fluorescence lifetime parameters of NGQDs and NGQDs+Fe<sup>3+</sup> ion.

| System                    | $\tau_1$ (ns) | $a_1$ | $\tau_2$ (ns) | $a_2$ | # $\langle\tau_{av}\rangle$ (ns) | $\chi^2$ |
|---------------------------|---------------|-------|---------------|-------|----------------------------------|----------|
| N-GQDs                    | 1.24          | 0.55  | 8.15          | 0.45  | 4.35                             | 1.10     |
| N-GQDs + Fe <sup>3+</sup> | 0.05          | 0.99  | 6.02          | 0.01  | 0.11                             | 1.08     |
